# Supplementary material for: Preparation and characterization of CdWO4:Cu nanorods with enhanced photocatalytic performance under sunlight irradiation
Source: Royal Society of Chemistry journal article supplement (doi:10.1039/c9nj05763c), 2020-01-01
Supplement: c9nj05763c1.pdf [file c9nj05763c1.pdf]

## Supporting Information

### **Preparation and Characterization of CdWO<sub>4</sub>: Cu Nanorods with Enhanced Photocatalytic Performance under Sunlight Irradiation**

Kura Narsimha,<sup>a</sup> M. Shekar Babu,<sup>a</sup> N. Anuradha,<sup>a</sup> Swarupa Guda,<sup>a</sup> B. Kranthi Kumar,<sup>a</sup>  
D. Mallesh,<sup>c</sup> G. Upender,<sup>b</sup> P. Muralidhar Reddy,<sup>a</sup> B. Vijaya Kumar,<sup>a\*</sup>

<sup>a</sup>Nanomaterials and Catalysis Research Laboratory, Department of Chemistry, Nizam College, Osmania University, Hyderabad-01, Telangana, India.

<sup>b</sup>Department of Physics, Nizam College, Osmania University, Hyderabad-01, Telangana, India.

<sup>c</sup>Indian Institute of Chemical Technology, Tarnaka, Hyderabad-07, Telangana, India

**\*Corresponding author:** Dr. B. Vijaya Kumar

E-mail: [vijaychemou@osmania.ac.in](mailto:vijaychemou@osmania.ac.in); [vijaychemou@gmail.com](mailto:vijaychemou@gmail.com)

**Name of the Journal to be published: New Journal of Chemistry**

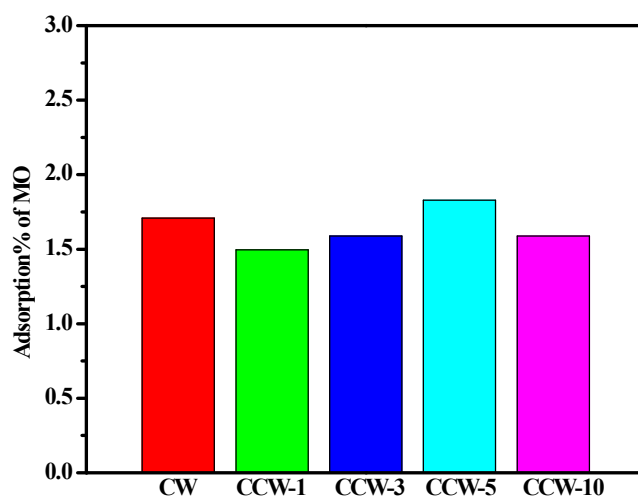

**Figure S1.** The adsorption ability of different photocatalysts with MO

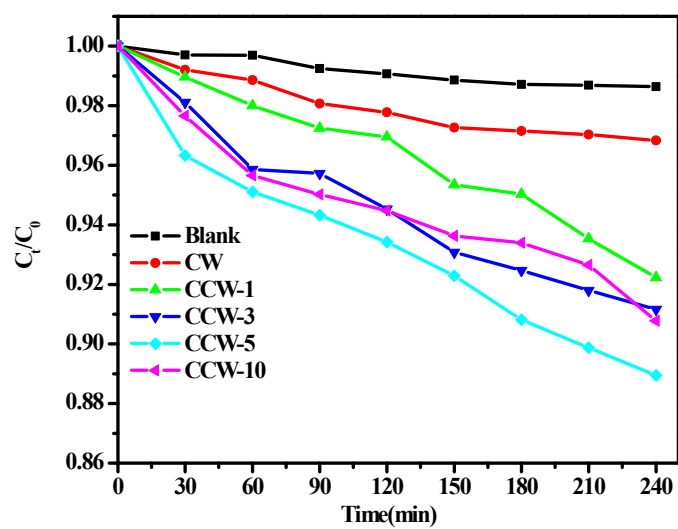

**Figure S2.** The photodegradation of MO in the absence of  $H_2O_2$  under sunlight irradiation
